# Supplementary material for: Dual-faced borax mediated synthesis of self-healable hydrogels merging dynamic covalent bonding and micellization
Source: Royal Society of Chemistry journal article supplement (doi:10.1039/d0py01354d), 2020-11-16
Supplement: d0py01354d1.pdf [file d0py01354d1.pdf]

## Supporting Information for

### **Dual-faced borax mediated synthesis towards self-healable hydrogels merging dynamic covalent bonding and micellization**

Xiaohui Li<sup>a,b</sup>, Hatice Mutlu<sup>b</sup>, Christian Fengler<sup>a</sup>, Manfred Wilhelm<sup>a</sup>, Patrick Theato<sup>\*a,b</sup>

- a. *Institute for Chemical Technology and Polymer Chemistry (ITCP), Karlsruhe Institute of Technology (KIT), Engesserstr.18, D-76131 Karlsruhe, Germany*
- b. *Soft Matter Synthesis Laboratory, Institute for Biological Interfaces III (IBG3), Karlsruhe Institute of Technology (KIT), Hermann-von-Helmholtz-Platz 1, D-76344 Eggenstein-Leopoldshafen, Germany*

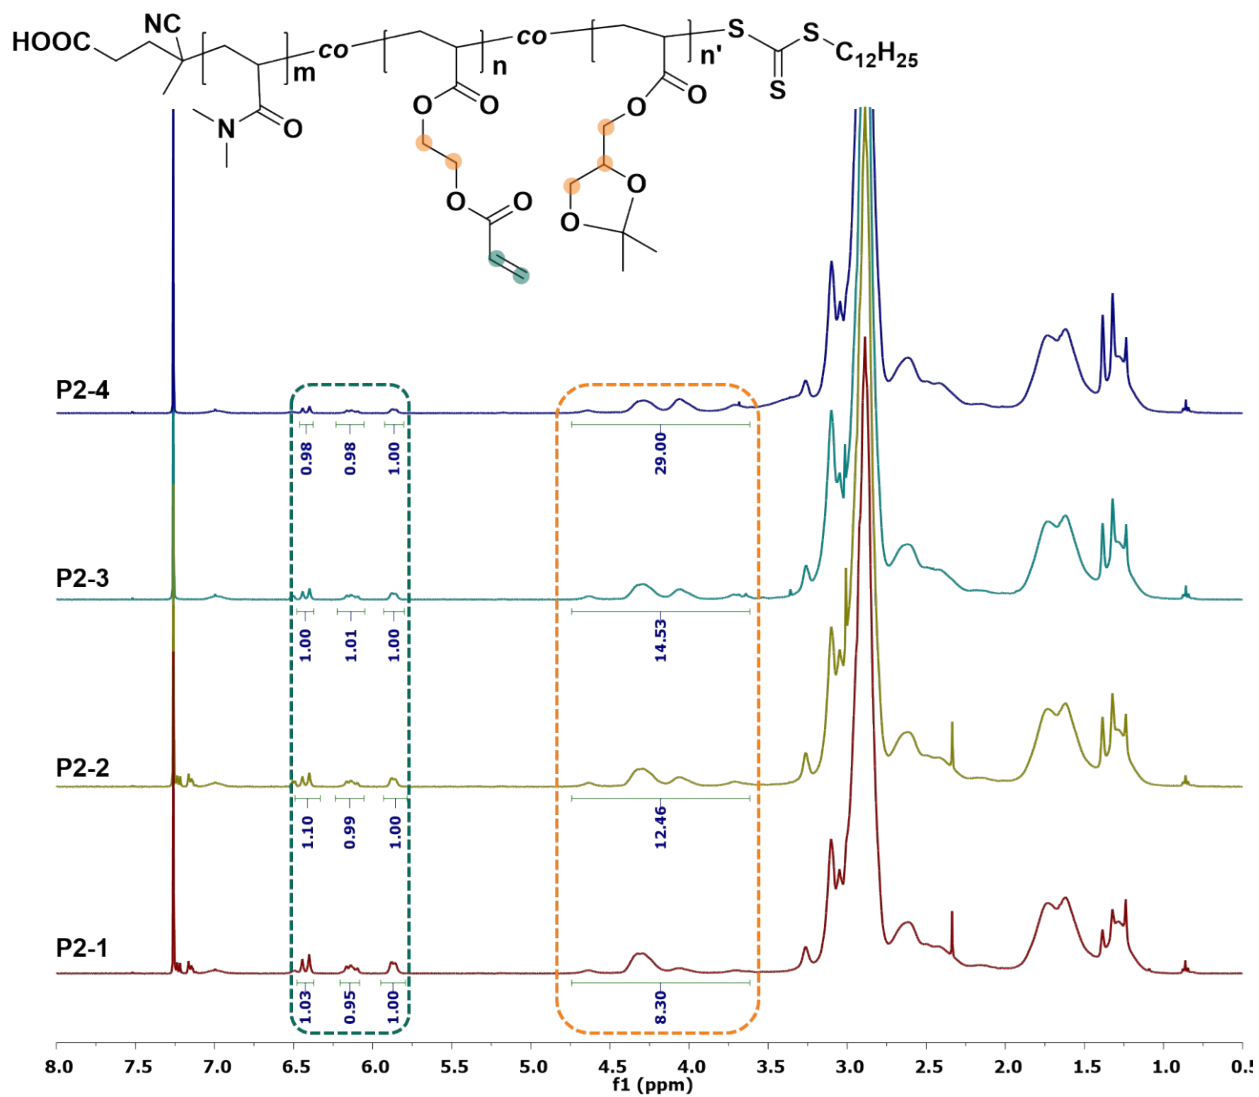

**Figure S1.** <sup>1</sup>H-NMR spectra (400 MHz) of P(DMA-co-EDA-co-IPA), i.e. P2, with different ratios of EDA: IPA in CDCl<sub>3</sub>, respectively P2-1, P2-2, P2-3 and P2-4.

**Table S1** The molar ratios of EDA : IPA as determined by <sup>1</sup>H-NMR spectra in Figure S1 for P2, respectively P2-1, P2-2, P2-3 and P2-4

| Copolymer | Feeding molar ratio<br>(EDA:IPA) | Actual molar ratio <sup>a</sup><br>(EDA:IPA) |
|-----------|----------------------------------|----------------------------------------------|
| P2-1      | 60:40                            | 60:51 (1:0.86)                               |
| P2-2      | 40:60                            | 40:67 (1:1.69)                               |
| P2-3      | 30:70                            | 30:63 (1:2.11)                               |
| P2-4      | 20:80                            | 20:100 (1:5.00)                              |

<sup>a</sup> Determined by <sup>1</sup>H-NMR spectra in Figure S1

**Table S2** Formulations for different specimens containing (P(DMA-co-EDA-co-DHA)) (P3) with different molar ratios of EDA : DHA (P3-1, P3-2, P3-3 and P3-4 are the deprotection products of P2-1, P2-2, P2-3 and P2-4, respectively) and their corresponding gelation time.

| Specimen | Copolymer | Acrylate: diol: SH: borax <sup>a</sup> | Solid Content | Gelation time |
|----------|-----------|----------------------------------------|---------------|---------------|
| S3-1     | P3-1      | 1:0.86:1:0.17                          | 20%           | 30"           |
| S3-2     | P3-2      | 1:1.69:1:0.33                          | 20%           | 58"           |
| S3-3     | P3-3      | 1:2.11:1:0.42                          | 20%           | 1'50"         |
| S3-4     | P3-4      | 1:5.00:1:1                             | 20%           | No gelation   |

<sup>a</sup> Molar ratio between the acrylate and diol groups was determined by <sup>1</sup>H-NMR spectra in Figure S1, and molar ratio of diol and borax was fixed at 5 : 1.

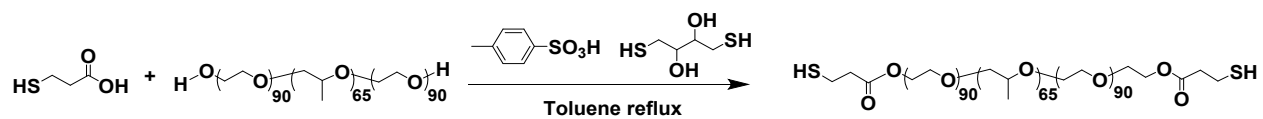

**Scheme 1.** The synthesis route of thiol-terminated Pluronic F127 (PF127-SH).

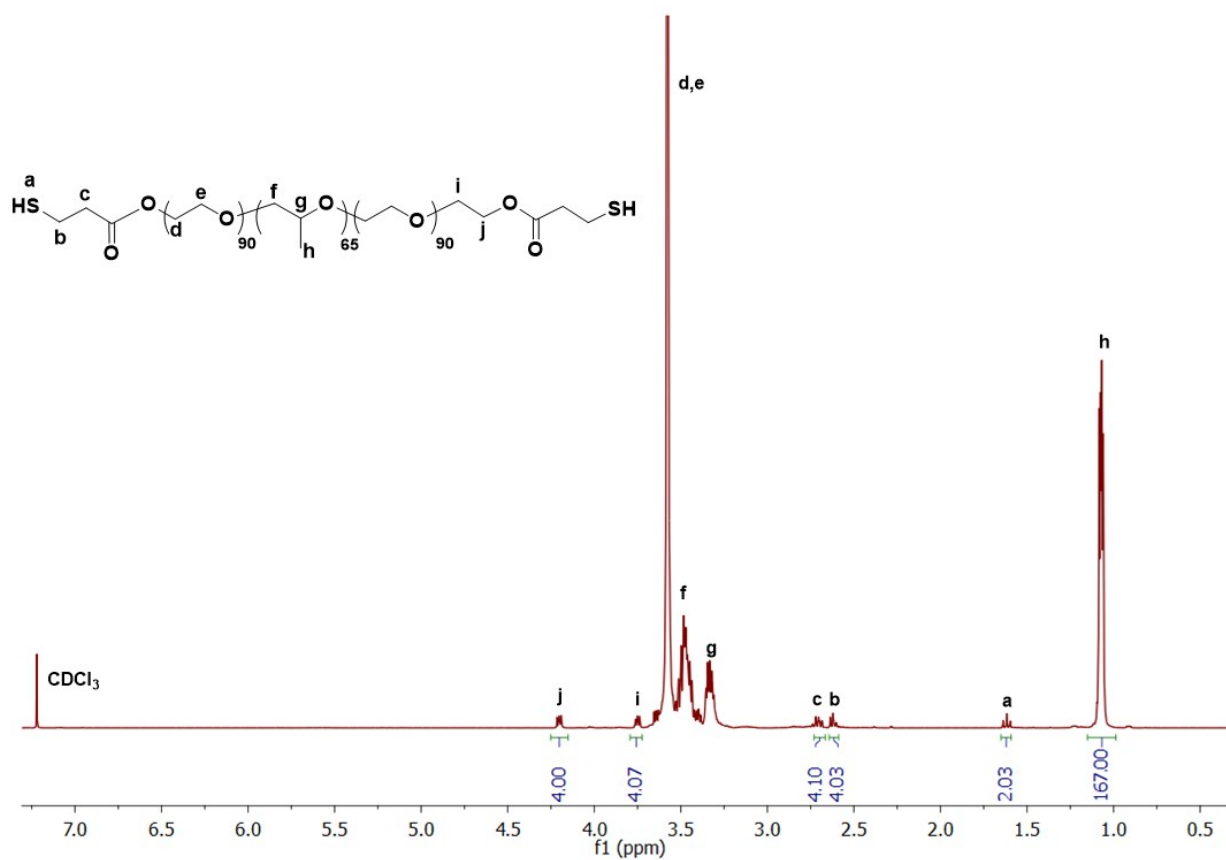

**Figure S2.** <sup>1</sup>H-NMR spectra (400 MHz) thiol-terminated Pluronic F127 (PF127-SH) in CDCl<sub>3</sub> with detailed integral information.

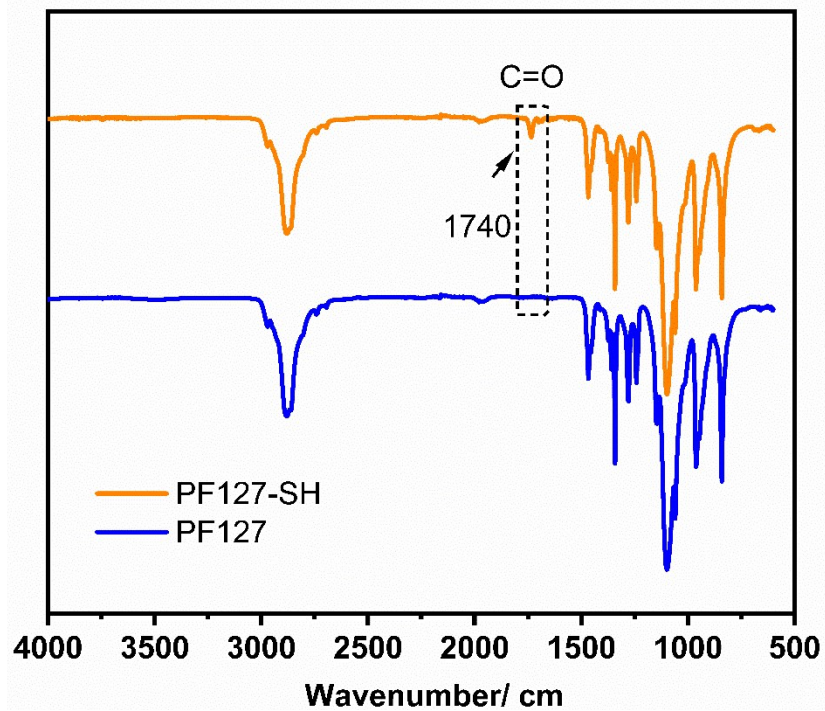

**Figure S3.** FT-IR spectra of thiol-terminated Pluronic F127 (PF127-SH, upper yellow line) and Pluronic F127 (PF127, bottom blue line).

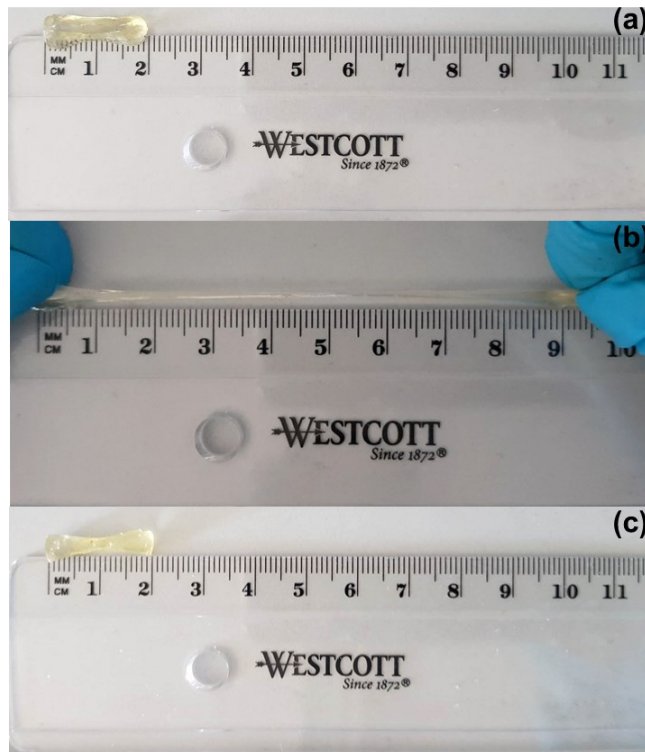

**Figure S4.** Photograph showing the shape recovery of the hydrogel sample: original sample (a); stretched to around 330 %; (c) after releasing the load for 30 min.

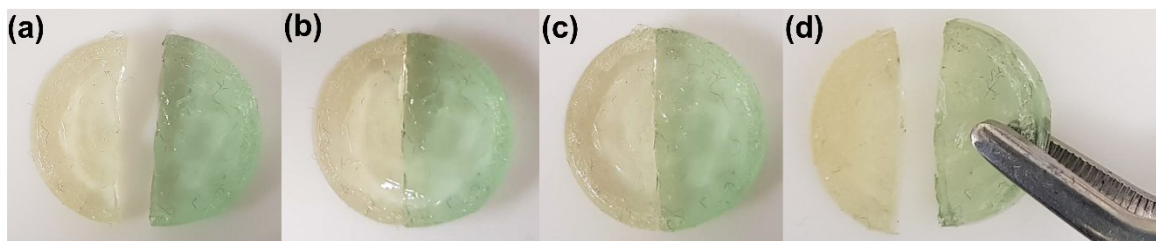

**Figure S5.** Photograph showing the cut-and-heal tests on P(DMA-*co*-EDA-*co*-IPA) (P2, with designated molar ratio of EDA / IPA =30 : 70) based hydrogel. (a) disk-shaped samples with and without dye were prepared and cut into pieces; (b) two pieces were put into contact; (c) self-healing for 24 h; (d) the two segments failed to integrate into one after 24 h.
